# Supplementary material for: Framing the Family: A Qualitative Exploration of Factors That Shape Family-Level Experience of Pediatric Genomic Sequencing
Source: MDPI journal article supplement (doi:10.3390/children10050774), 2023-04-25
Supplement: s1 [file s1]

# Framing the family: A qualitative exploration of factors that shape family-level experience of pediatric genomic sequencing

## Supplementary Material

**Authors:** Hadley Stevens Smith, PhD, MPSA,<sup>1</sup> Emily S. Bonkowski, ScM,<sup>2,3</sup> Madison R. Hickingbotham, MS,<sup>1</sup> Raymond Belanger Deloge, MS,<sup>4</sup> Stacey Pereira, PhD<sup>5</sup>

<sup>1</sup>PRecisiOn Medicine Translational Research (PROMoTeR) Center, Department of Population Medicine, Harvard Medical School and Harvard Pilgrim Health Care Institute, Boston, MA 02215, USA

<sup>2</sup>Institute for Public Health Genetics, University of Washington School of Public Health, Seattle, WA 98195, USA

<sup>3</sup>Center for Pediatric Neurological Disease Research, St. Jude Children's Research Hospital, Memphis, TN 38105, USA

<sup>4</sup>Department of Molecular and Human Genetics, Baylor College of Medicine, Houston, TX 77030, USA

<sup>5</sup>Center for Medical Ethics and Health Policy, Baylor College of Medicine, Houston, TX 77030, USA

**Table S1. Patients' clinical diagnoses**

| Patient's primary clinical diagnosis, n (%)           |           |
|-------------------------------------------------------|-----------|
| <b>Social and Behavioral</b>                          |           |
| Autism Spectrum Disorder                              | 5 (12.2%) |
| Attention and Concentration Deficit                   | 1 (2.4%)  |
| <b>Developmental Delay</b>                            |           |
| Cognitive and Neurobehavioral Dysfunction             | 1 (2.4%)  |
| Delayed Milestones                                    | 1 (2.4%)  |
| Developmental Delay                                   | 2 (4.9%)  |
| Global Developmental Delay                            | 4 (9.8%)  |
| Gross Motor Development Delay                         | 1 (2.4%)  |
| Intellectual Delay                                    | 1 (2.4%)  |
| Intellectual Disability                               | 2 (4.9%)  |
| Speech Delay                                          | 2 (4.9%)  |
| <b>Dysmorphic Craniofacial Features</b>               |           |
| Dysmorphic Features                                   | 1 (2.4%)  |
| Plagiocephaly                                         | 1 (2.4%)  |
| <b>Spasm/Seizure Disorder</b>                         |           |
| Seizure Disorder                                      | 1 (2.4%)  |
| <b>Musculoskeletal/Connective Tissue</b>              |           |
| Ehlers-Danlos syndrome                                | 1 (2.4%)  |
| Spastic Diplegia                                      | 1 (2.4%)  |
| Toe Walking                                           | 1 (2.4%)  |
| <b>Multisystemic Disorders</b>                        |           |
| 47, XYY                                               | 1 (2.4%)  |
| Cornelia de Lange syndrome                            | 1 (2.4%)  |
| Hypohidrotic Ectodermal Dysplasia                     | 1 (2.4%)  |
| MN1 C-Terminal Truncation syndrome (CEBALID syndrome) | 1 (2.4%)  |
| Noonan syndrome-like disorder                         | 1 (2.4%)  |
| Williams Syndrome                                     | 1 (2.4%)  |
| <b>Gastrointestinal/Genitourinary</b>                 |           |
| Posterior Urethral Valves                             | 1 (2.4%)  |
| Infantile Liver Failure Syndrome Type 1               | 1 (2.4%)  |

|                                                |          |
|------------------------------------------------|----------|
| <b>Cardiac</b>                                 |          |
| Tetralogy of Fallot                            | 1 (2.4%) |
| Atrial Septal Defect                           | 1 (2.4%) |
| <b>Other</b>                                   |          |
| Oral Aversion                                  | 1 (2.4%) |
| Overgrowth syndrome                            | 1 (2.4%) |
| Pyruvate Dehydrogenase Deficiency              | 1 (2.4%) |
| Retinitis Pigmentosa of Both Eyes              | 1 (2.4%) |
| Sensorineural Hearing Loss of Both Ears        | 1 (2.4%) |
| <b>Patient's secondary clinical diagnosis</b>  |          |
| <b>Social and Behavioral</b>                   |          |
| Autism Spectrum Disorder                       | 1 (2.4%) |
| Attention Deficit Hyperactivity Disorder       | 2 (4.9%) |
| <b>Developmental Delay</b>                     |          |
| Cognitive communication deficit                | 1 (2.4%) |
| Developmental delay                            | 3 (7.3%) |
| Expressive language delay                      | 1 (2.4%) |
| Mixed receptive expressive language disorder   | 1 (2.4%) |
| Mixed receptive language disorder              | 1 (2.4%) |
| Speech and language deficits                   | 1 (2.4%) |
| Speech articulation disorder                   | 1 (2.4%) |
| Speech delay                                   | 1 (2.4%) |
| Family history of speech and language disorder | 1 (2.4%) |
| Global developmental delay                     | 1 (2.4%) |
| <b>Dysmorphic Craniofacial Features</b>        |          |
| Dysmorphic craniofacial features               | 2 (4.9%) |
| Macrocephaly                                   | 2 (4.9%) |
| <b>Spasm / Seizure Disorder</b>                |          |
| Infantile spasms                               | 2 (4.9%) |
| <b>Musculoskeletal / Connective Tissue</b>     |          |
| Hypermobility syndrome                         | 1 (2.4%) |
| Hypotonia                                      | 2 (4.9%) |
| Hypertonia                                     | 1 (2.4%) |
| Short stature                                  | 1 (2.4%) |
| Action tremor                                  | 1 (2.4%) |
| Right sided hemiplegic cerebral palsy          | 1 (2.4%) |
| <b>Gastrointestinal/Genitourinary</b>          |          |
| Constipation, unspecified constipation type    | 1 (2.4%) |
| Penile hypospadias                             | 1 (2.4%) |
| Congenital choanal atresia                     | 1 (2.4%) |
| <b>Other</b>                                   |          |
| Family history of SIDS                         | 1 (2.4%) |
| Juvenile myelomonocytic leukemia               | 1 (2.4%) |
| Polymicrogyria                                 | 1 (2.4%) |
| Bronchopulmonary dysplasia                     | 1 (2.4%) |
| Dyslexia                                       | 1 (2.4%) |
